# Supplementary material for: A Simplified and Robust Activation Procedure of Glass Surfaces for Printing Proteins and Subcellular Micropatterning Experiments
Source: MDPI journal article supplement (doi:10.3390/bios12030140), 2022-02-25
Supplement: s1 [file s1]

Communication

# A Simplified and Robust Activation Procedure of Glass Surfaces for Printing Proteins and Subcellular Micropatterning Experiments

Tina Karimian <sup>1</sup>, Roland Hager <sup>1</sup>, Andreas Karner <sup>2</sup>, Julian Weghuber <sup>1,3</sup> and Peter Lanzerstorfer <sup>1,\*</sup>

<sup>1</sup> University of Applied Sciences Upper Austria, School of Engineering, 4600 Wels, Austria; tina.karimian@fh-wels.at; roland.hager@fh-wels.at; julian.weghuber@fh-wels.at; peter.lanzerstorfer@fh-wels.at

<sup>2</sup> University of Applied Sciences Upper Austria, School of Engineering, 4020 Linz, Austria; andreas.karner@fh-linz.at

<sup>3</sup> Austrian Competence Center for Feed and Food Quality, Safety & Innovation, FFoQSI GmbH, 3430 Tulln, Austria; julian.weghuber@ffoqi.at

\* Correspondence: peter.lanzerstorfer@fh-wels.at; Tel.: +43-50804-44402

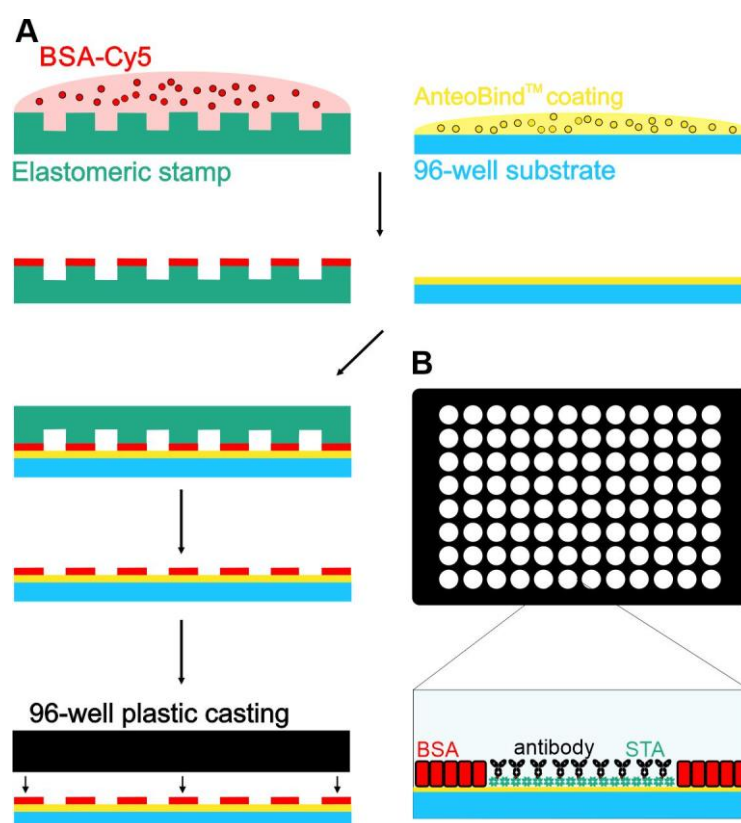

**Figure S1.** Cross-section sketches of  $\mu$ CP procedure. (A) A PDMS stamp is incubated with BSA (or BSA-Cy5) for surface passivation. At the same time, an uncoated clean glass substrate is covered with AnteoBind coating solution. Both, the stamp and the substrate, are washed and dried, followed by  $\mu$ CP (the stamp is laid onto the coated substrate by its own weight). After ripping of the stamp, the microstructured glass is finally bonded with a multi-well plastic casting. (B) Ready-to-use multi-well plate with micron-scale BSA grid for further live cell experiments. In a standard subcellular micropatterning experiment, single wells are further functionalized with streptavidin and biotinylated anti-bait antibodies prior cell seeding.

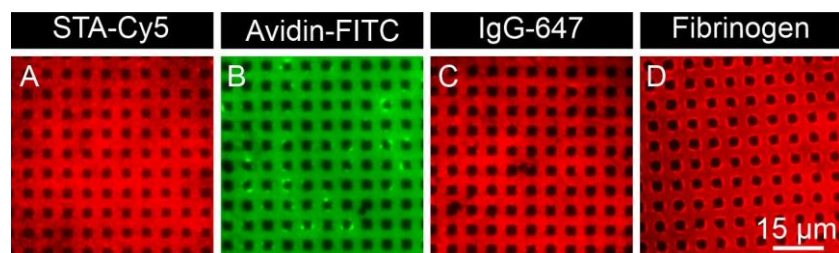

**Figure S2.**  $\mu$ CP of various biomolecules. Instead of printing BSA, different proteins were used to show the versatile binding properties of the surface coating. TIRF microscopy images show representative micron-scale protein grids of: (A) Cy5-conjugated streptavidin, (B) FITC-labeled avidin, (C) Alexa647-labeled anti-EGFR antibody and (D) biotin-labeled fibrinogen with subsequent incubation of STA-Cy5.
